# Supplementary material for: Small nucleolar RNA Sf-15 regulates proliferation and apoptosis of Spodoptera frugiperda Sf9 cells
Source: PubMed Central journal article supplement (PMC6458620; doi:10.1186/s12867-019-0128-9), 2019-04-11
Supplement: 12867_2019_128_MOESM2_ESM.pdf [file 12867_2019_128_MOESM2_ESM.pdf]

Additional file 2:

## **Small nucleolar RNA Sf-15 regulates proliferation and apoptosis of**

### ***Spodoptera frugiperda* Sf9 cells**

Bo Wu, Lei Huang, Wujie Qiu, Xiao Liu, Yawen Shen, Yiping Lu, Zonglin Yang, Xinmei Li, Bin Cui,  
Shidong Xu, Huili Qiao, Reng Qiu, Lunguang Yao, Yunchao Kan, Dandan Li

## **Content**

1. **Additional file 2: Fig. S1.** Functional classification of genes with reverse expression pattern upon Bm-15 repression and overexpression.
2. **Additional file 2: Table S2.** Primer set used in the experiment.
3. **Additional file 2: Table S3.** Unigenes were subjected to Blastx against public protein database in Sf9 cells.

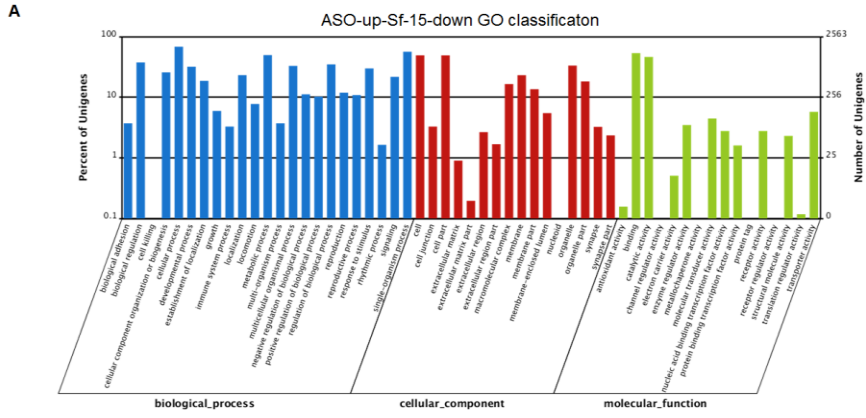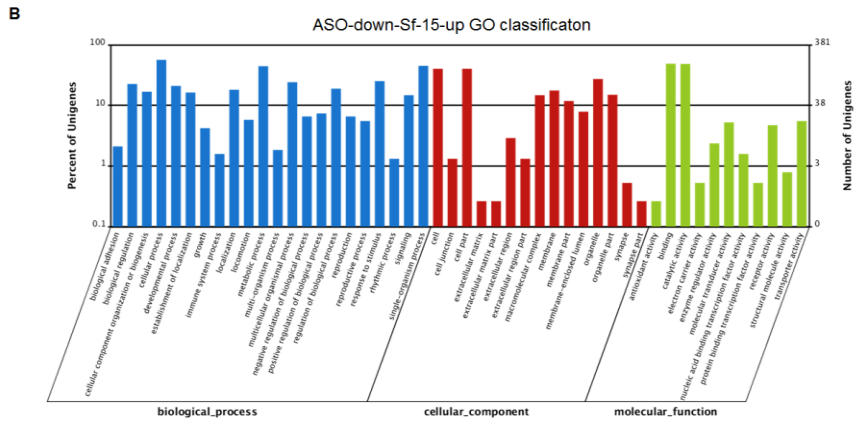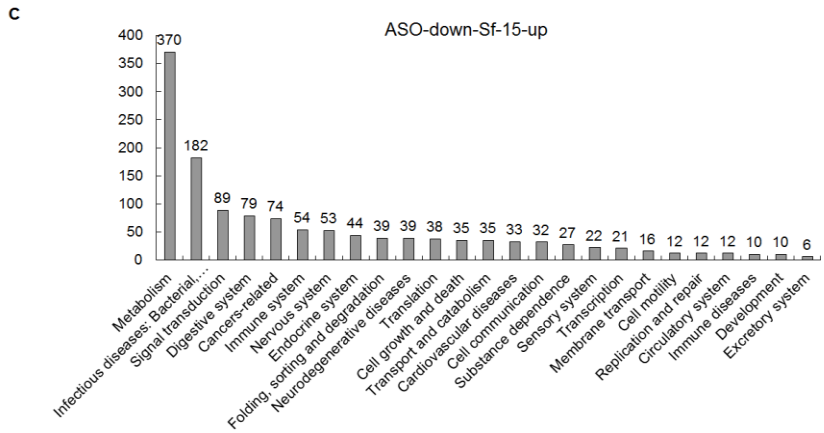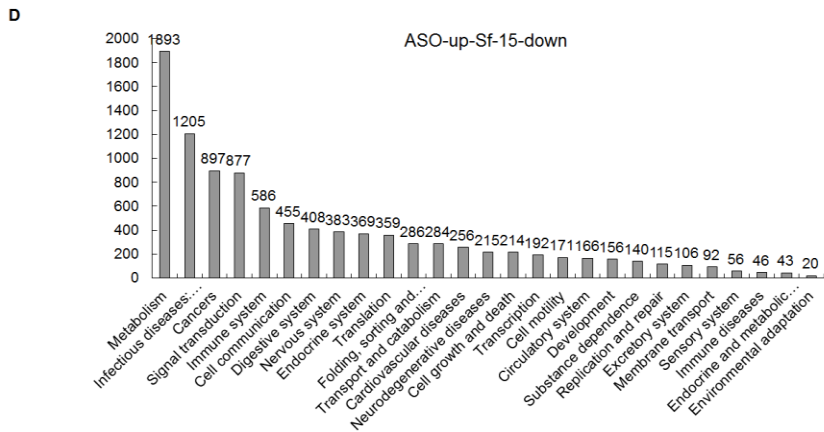

**Additional file 2: Fig. S1.** Functional classification of genes with reverse expression pattern upon Bm-15 repression and overexpression. (A) GO classification of genes with expression increased as Sf-15 was knocked down but decreased when Sf-15 was overexpressed. (B) GO classification of genes with expression repressed when Sf-15 was knocked down but induced when Sf-15 was overexpressed. (C) Statistic analysis of the numbers of genes in figure A. (D) Statistic analysis of the numbers of genes in figure B. ASO and Sf-15 means cells were transfected with antisense oligonucleotides of Sf-15 and overexpression vector *pBac[A3-EGFP-A3-Sf-15]*, respectively. Up means the expression of genes were increased, down means the expression of genes were decreased.

**Additional file 2: Table S2. Primer set used in the experiment**

| Gene                                                   | Forward primer                | Reverse primer              |
|--------------------------------------------------------|-------------------------------|-----------------------------|
| <i>U6</i>                                              | CTAAAATTGGAACGATACAG          | ATTTTGCGTGTCATCCTT          |
| <i>actinA3</i>                                         | TAGACAATGGCTCCGGTAT           | CCAGTTAGTGACGATTCC          |
| <i>Sf-15</i>                                           | ATTCAATGATGATACAATGCTTTATG    | AAATTCAGCCATCCAAGGAAGTT     |
| <i>Sf-15</i> primer for vector construction            | CATGCCATGGATTCAATGATGATACAATG | GGGGTACCCCAAATTCAGCCATC     |
| <i>actinA3</i> promoter primer for vector construction | CGGGATCCCGCGTTACCATATATGGTGA  | CATGCCATGGCCCGTACGAGTCCTTCT |
| <i>P53</i>                                             | TATGATATGCCGTATGAAGAACTGG     | ATTCGACAATTGATGCGGAT        |
| <i>Apoptosis inhibitor 5</i>                           | CAAGAACTTTTGGAGTTGCAG         | CATGTTGTGTGCACTGGATAACT     |
| <i>Caspase 1</i>                                       | ATGCTGGACGGAAAACAAGACAA       | GGCATTCTATCAACTGGCATCCTA    |
| <i>Cn</i>                                              | TCACCCATACTGGTTGCC            | CTGAGATTTGCTTCCTCC          |
| <i>Bad</i>                                             | CGTGAGAATGCGTAGAAA            | ACGAGACCACCGTAACAA          |

**Additional file 2: Table S3. Unigenes were subjected to Blastx against public protein database in Sf9 cells**

| Public protein database | NR     | NT     | Swiss-Prot | KEGG   | COG   | GO    | ALL    |
|-------------------------|--------|--------|------------|--------|-------|-------|--------|
| Numbers                 | 19,823 | 21,957 | 15,313     | 13,606 | 7,477 | 9,291 | 26,693 |
